# Supplementary material for: Effects of polarized light on the optical and self-oscillation behaviors of liquid crystal network polymers
Source: Royal Society of Chemistry journal article supplement (doi:10.1039/d1tc03870b), 2021-01-01
Supplement: d1tc03870b3.pdf [file d1tc03870b3.pdf]

## Supporting information

### **The effects of the polarized light on the optical and self-oscillation behaviors of liquid crystal network polymers**

R.Zibaie<sup>a,b</sup>, M.S.Zakerhamidi<sup>a,b,c\*</sup>, S. Korram<sup>a,b</sup>, A. Ranjkesh<sup>d</sup>

*a) Faculty of Physics, University of Tabriz, Tabriz, Iran*

*b) Research Institute for Applied Physics and Astronomy, University of Tabriz, Tabriz, Iran*

*c) Photonics Center of Excellence, University of Tabriz, Tabriz, Iran*

*d) Condensed Matter Department, J. Stefan Institute, Jamova 39, Ljubljana, Slovenia*

\* Corresponding Authors

Mohammad sadegh Zakerhamidi

Tel: number: +98-41-33393353

Fax: number: +98-41-33347050

E-mail: [Zakerhamidi@tabrizu.ac.ir](mailto:Zakerhamidi@tabrizu.ac.ir)

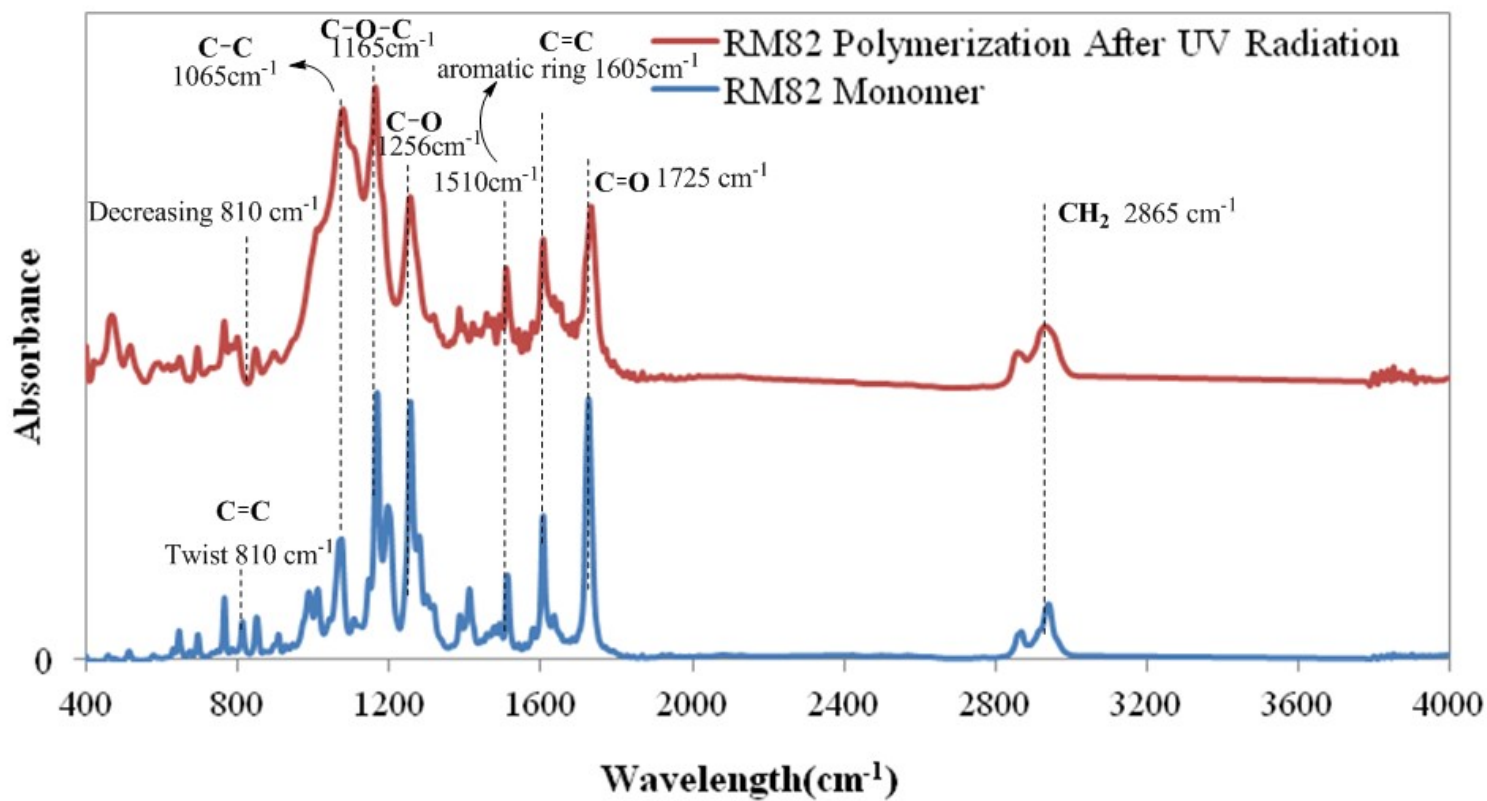

**Figure S1.** FT-IR spectra before and after photo-polymerization of RM 82

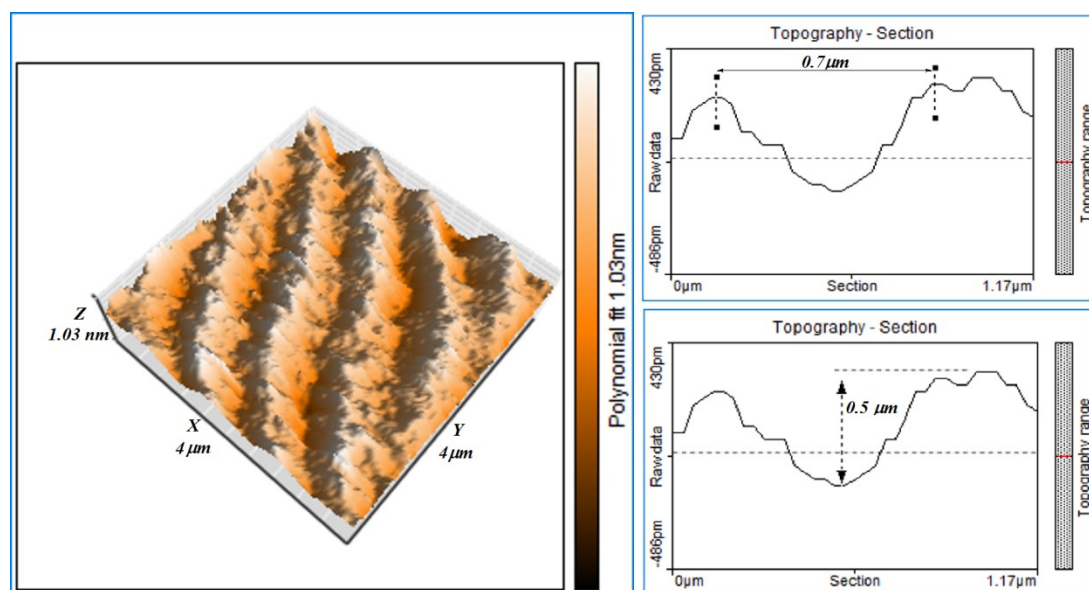

a

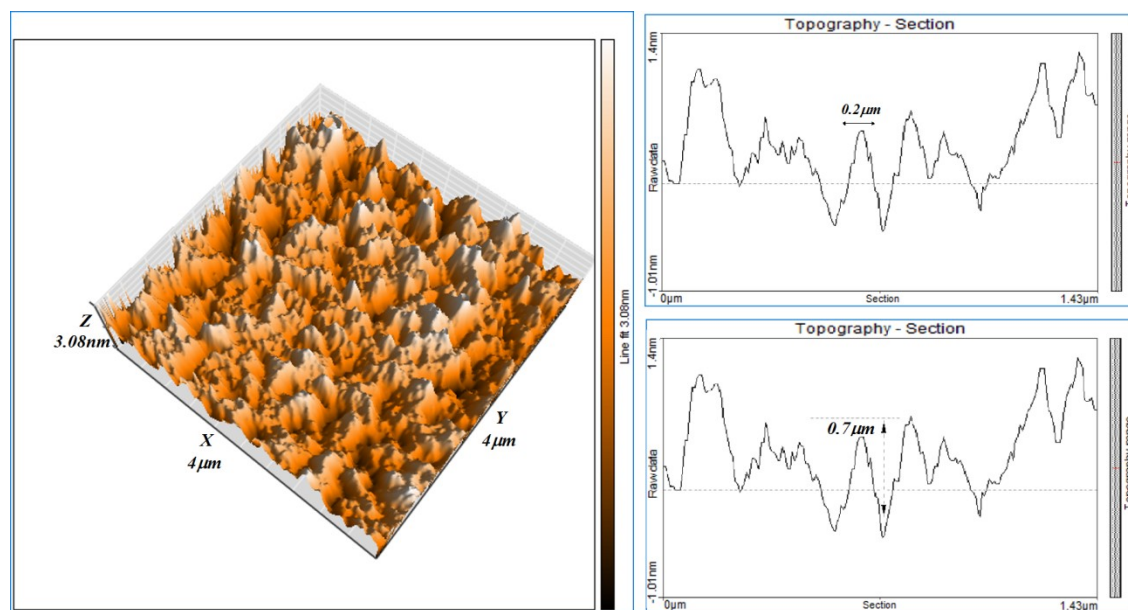

b

**Figure S2.** AFM images analysis in, a) the planar orientate side (front) ,b) the homeotropic oriented side

### Third order nonlinear absorption

In open-aperture z-scan the normalized transmission of a nonlinear media is a function of nonlinear absorption ( $\beta$ ) and is given by: <sup>1</sup>

$$(1) \quad T_{norm}(z) = \frac{Ln(1+q_0(z,t))}{q_0(z,t)}$$

Where,

$$q_0(z,t) = \beta I_0 L_{eff} / (1 + z^2/z_0^2) \quad (2)$$

In eq 2, the diffraction length of the beam, the effective length of sample and the intensity of the laser beam at the focus point symbolized by  $Z_0$ ,  $L_{eff}$  and  $I_0$ , respectively.  $L_{eff}$  is the effective thickness of the sample and is obtained from the following equation: <sup>2</sup>

$$L_{eff} = \frac{1 - e^{-\alpha L}}{\alpha} \quad (3)$$

$$\alpha = \frac{1}{t} Ln \frac{1}{T} \quad (4)$$

Where,  $t$  is the sample thickness,  $\alpha$  is the linear absorption and  $L$  is the thickness obtained from linear absorption spectra and Bear-Lambert law.

**Table S1.** Linear absorption and nonlinear absorption coefficients in LCN

| Polarized light( 405 nm)160 mWcm <sup>-2</sup> | $\alpha$ (1/cm) | $\beta$ (cm/W) | $L_{eff}(\text{cm})$ |
|------------------------------------------------|-----------------|----------------|----------------------|
| 45° to the planer side (E45°)                  | 69.09           | 0.070          | 0.0018               |
| Parallel to the planer side (E ∥ x)            | 97.8775         | 0.062          | 0.0011               |
| Perpendicular to the planer side (E ⊥ x)       | 86.36           | 0.081          | 0.0008               |

## References

- 1 E. W. Van Stryland ,M. Sheik-Bahae, Z-scan Measurements of Optical Nonlinearities, in: M. G. Kuzyk , C. W.Dirk ( Eds.),Characterization Techniques and Tabulations for Organic Nonlinear Materials, Marcel Dekker, Inc. New York, 1998, 655-692.
- 2 M. Sheik-Bahae, A.A. Said, V. Stryland, Opt. Lett. 1989, 14, 955.
